# Supplementary material for: Examining the association of habitual e-cigarette use with inflammation and endothelial dysfunction in young adults: The VAPORS-Endothelial function study
Source: PubMed Central journal article supplement (PMC10257221; doi:10.18332/tid/162327), 2023-06-12
Supplement: TID-21-75-s1.pdf [file TID-21-75-s1.pdf]

**SUPPLEMENTARY TABLES:**

Supplementary Table 1: Inclusion Criteria for the Parent Oral VAPORS Study Among Young Adults, 2017-2019.

| Inclusion Criteria                                                               | Exclusion Criteria                                         |
|----------------------------------------------------------------------------------|------------------------------------------------------------|
| Age 18-34years                                                                   | Not between the ages of 18-34years                         |
| Non-users: Do not currently use any tobacco products                             | Do not own a smartphone                                    |
| Non-users: Have not used e-cigarette in the past 90 days                         | Will not remain in the Baltimore area for the next 2 years |
| Less than 5 pack-years of exposure to tobacco products                           | Report as HIV positive                                     |
| Have a smartphone for personal use that is compatible with the VAPORS mobile app | Can not read and speak English                             |
| Able to speak and read English                                                   | Have a Blood Pressure > 180/100 mmHg                       |
| Report as HIV negative                                                           |                                                            |
| Not planning to leave the area within the next 2 years                           |                                                            |

Supplementary Table 2: Details of Inflammatory Marker Assessment **for the Cross-sectional VAPORS-Endothelial Function Study among Young Adults, 2017-2019.**

| Analyte         | ELISA Supplier | Intra-assay % coefficients of variability | Inter-assay % coefficients of variability | Limit of detection |
|-----------------|----------------|-------------------------------------------|-------------------------------------------|--------------------|
| Hs CRP          | ALPCO          | 1.54                                      | 5.88                                      | 0.124 ng/ml        |
| IL-6            | RnD Systems    | 4.77                                      | 7.79                                      | 0.039 pg/ml        |
| Fibrinogen      | AssayPro       | 1.05                                      | 5.20                                      | 0.37 µg/ml         |
| P-Selectin      | RnD Systems    | 3.36                                      | 9.85                                      | 0.5 ng/ml          |
| Myeloperoxidase | RnD Systems    | 0.37                                      | 6.30                                      | 1.5 ng/ml          |

Supplementary Table 3: E-cigarette use Characteristics among E-cigarette Users **in the Cross-sectional VAPORS-Endothelial Function Study among Young Adults, 2017-2019.**

| Characteristic                                | n (%)      |
|-----------------------------------------------|------------|
| Median duration of e-cigarette use (months)   | 24 (9, 48) |
| Type e-cigarette/vaping device used           |            |
| Rechargeable with a pre-filled cartridge      | 8 (35)     |
| Device with a refillable tank                 | 8 (35)     |
| Modular system                                | 7 (30)     |
| Frequency of e-cigarette use (times per week) |            |
| Every day                                     | 19 (83)    |

|                                               |         |
|-----------------------------------------------|---------|
| Most days                                     | 2 (9)   |
| 1-3 days                                      | 2 (9)   |
| The flavor of e-cigarettes used most often    |         |
| Menthol/mint                                  | 9 (39)  |
| Sweet                                         | 5 (22)  |
| Fruity                                        | 9 (39)  |
| Other                                         | 0       |
| The concentration of nicotine used most often |         |
| No Nicotine                                   | 1 (4)   |
| Mild nicotine (0.1-0.9%)                      | 8 (35)  |
| Moderate (1-1.9%)                             | 3 (13)  |
| Bold ( $\geq 2\%$ )                           | 9 (39)  |
| Don't know/Not sure                           | 2 (9)   |
| How soon after waking use e-cigarettes        |         |
| Within 10 minutes                             | 4 (17)  |
| Within 1 hr.                                  | 15 (65) |
| Within 3 hrs.                                 | 0       |
| >3 hrs.                                       | 4 (17)  |
| Reason for using e-cigarettes                 |         |
| I like it                                     | 11 (48) |
| To quit smoking or avoid returning to smoking | 8 (35)  |
| Believe it's healthier                        | 0       |
| Cheaper                                       | 0       |
| Other                                         | 4 (17)  |
